# Supplementary material
Source: MDPI journal article supplement (https://www.mdpi.com/2673-4583/6/1/9)
Supplement: s1 [file s1]

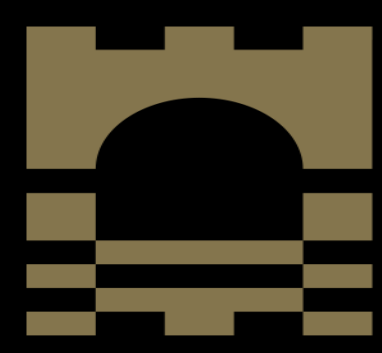

## Reducing our Plastic Imprint

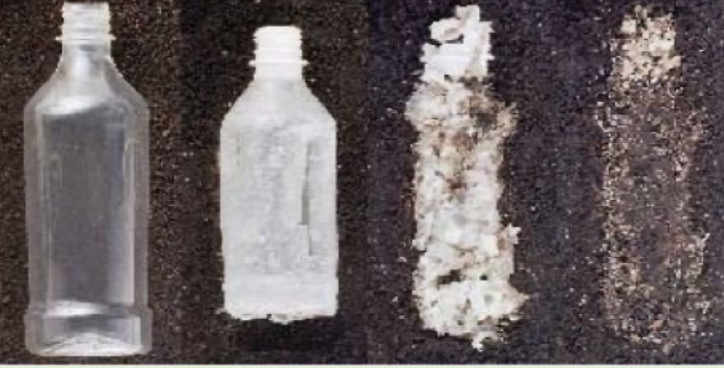

# Enhanced Biodegradation of Polyethylene terephthalate (PET) Via Microwave Assisted Green Bio-Based Deep Eutectic Solvent Pre-Treatment Technique

Muhammad Azeem\* <sup>1</sup>, Olivia Adly<sup>1</sup>, Margaret E. Brennan Fournet<sup>1</sup>,

<sup>1</sup> Materials Research Institute, Technological university of the Shannon, Athlone Campus, N37 HD68 Ireland

## Introduction

Most plastics degradation methods are currently inefficient and are limited by processing difficulties, quality loss and diminished value. This research focuses on the development of novel mechano-chemical disintegration processes for the breakdown of waste plastics. The outputs will be biocatalysed and used as building blocks for new polymers or other bioproducts.

## Aim

The aim of the project is to use innovative green pre-treatment processes to recover lower molecular weight compounds/oligomers which will generate high performance new polymers or bioproducts.

## Objectives

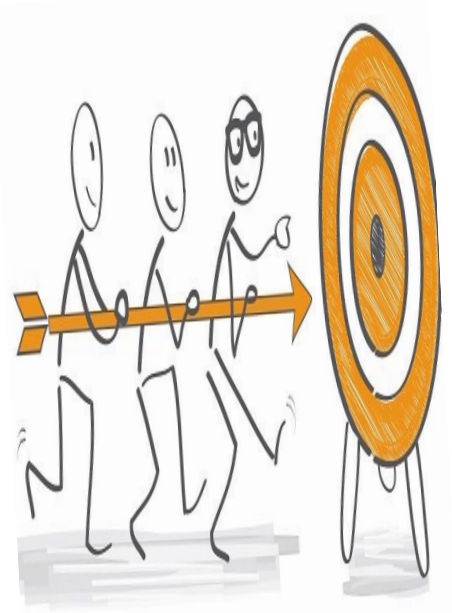

- Utilization of environment friendly Deep eutectic solvents (DESs) based microwave technology (MW) in degradation of plastics (PET).
- To demonstrate enhanced biotransformation(using LCC variant) of PET plastics waste into monomers by developing an optimized enzymatic hydrolysis technique.

## Methods

- Synthesis of suitable DESs (via stirring and heating at desired ratios (1:1:1))

|      |                  |          |
|------|------------------|----------|
| Urea | Choline Chloride | glycerol |
|------|------------------|----------|

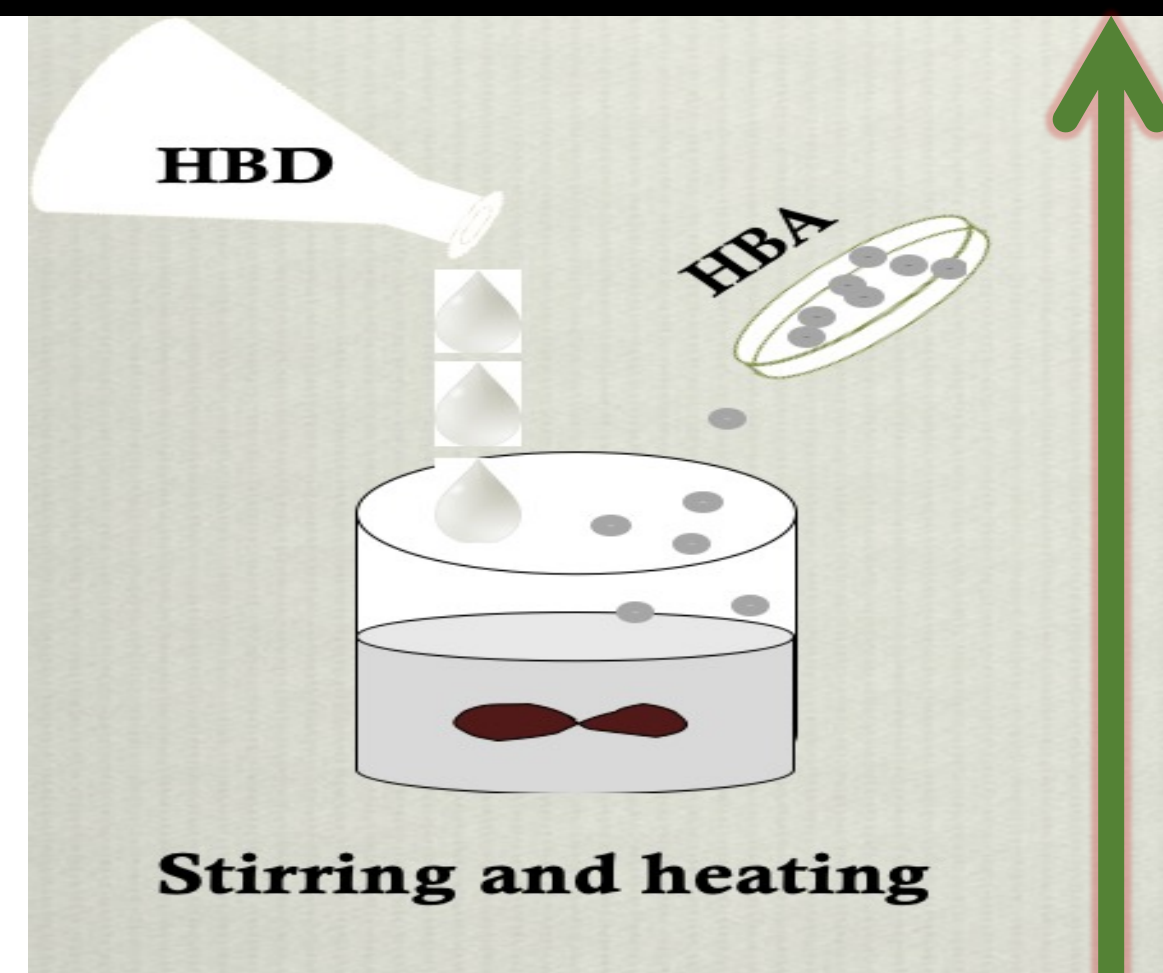

- Development of efficient microwave treatment of PET powder under optimized conditions using Box-Behnken Design (BBD).

Exposure time: 90 seconds,  
Power: 350 W,

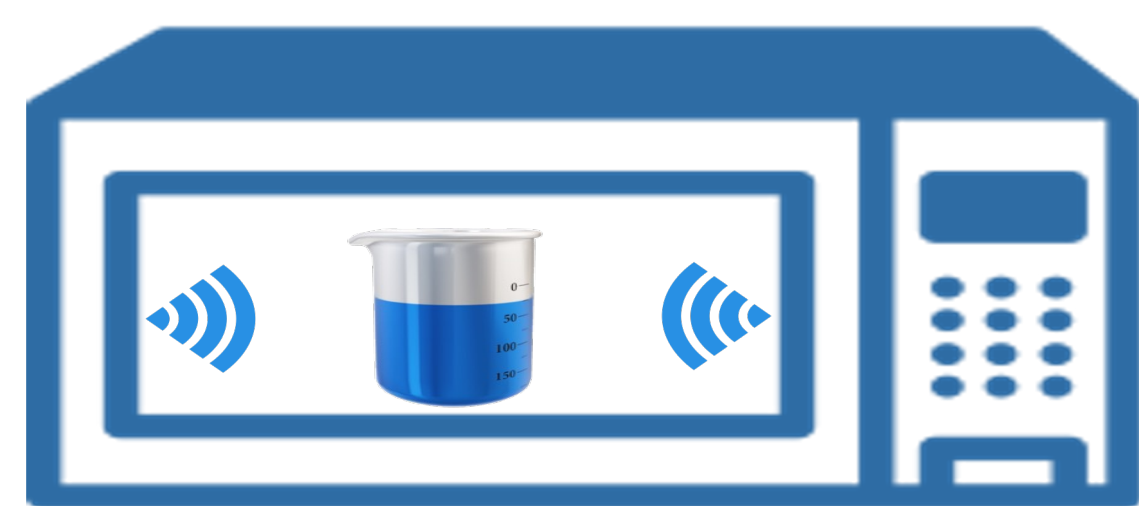

- Characterisations (Fourier transform infrared spectroscopy (FTIR), Differential Scanning Calorimetry (DSC), Thermal gravimetric analysis(TGA))

## Results

### FTIR:

- Formation of new hydrogen bonds depicts successful synthesis of DES.
- Formation of OH group in oligomers which is not present in reference due to formation of chains containing OH,CH end groups.
- Reduction in peaks 1341 and 1241 depicts amorphous nature of materials as shown in Figure.1

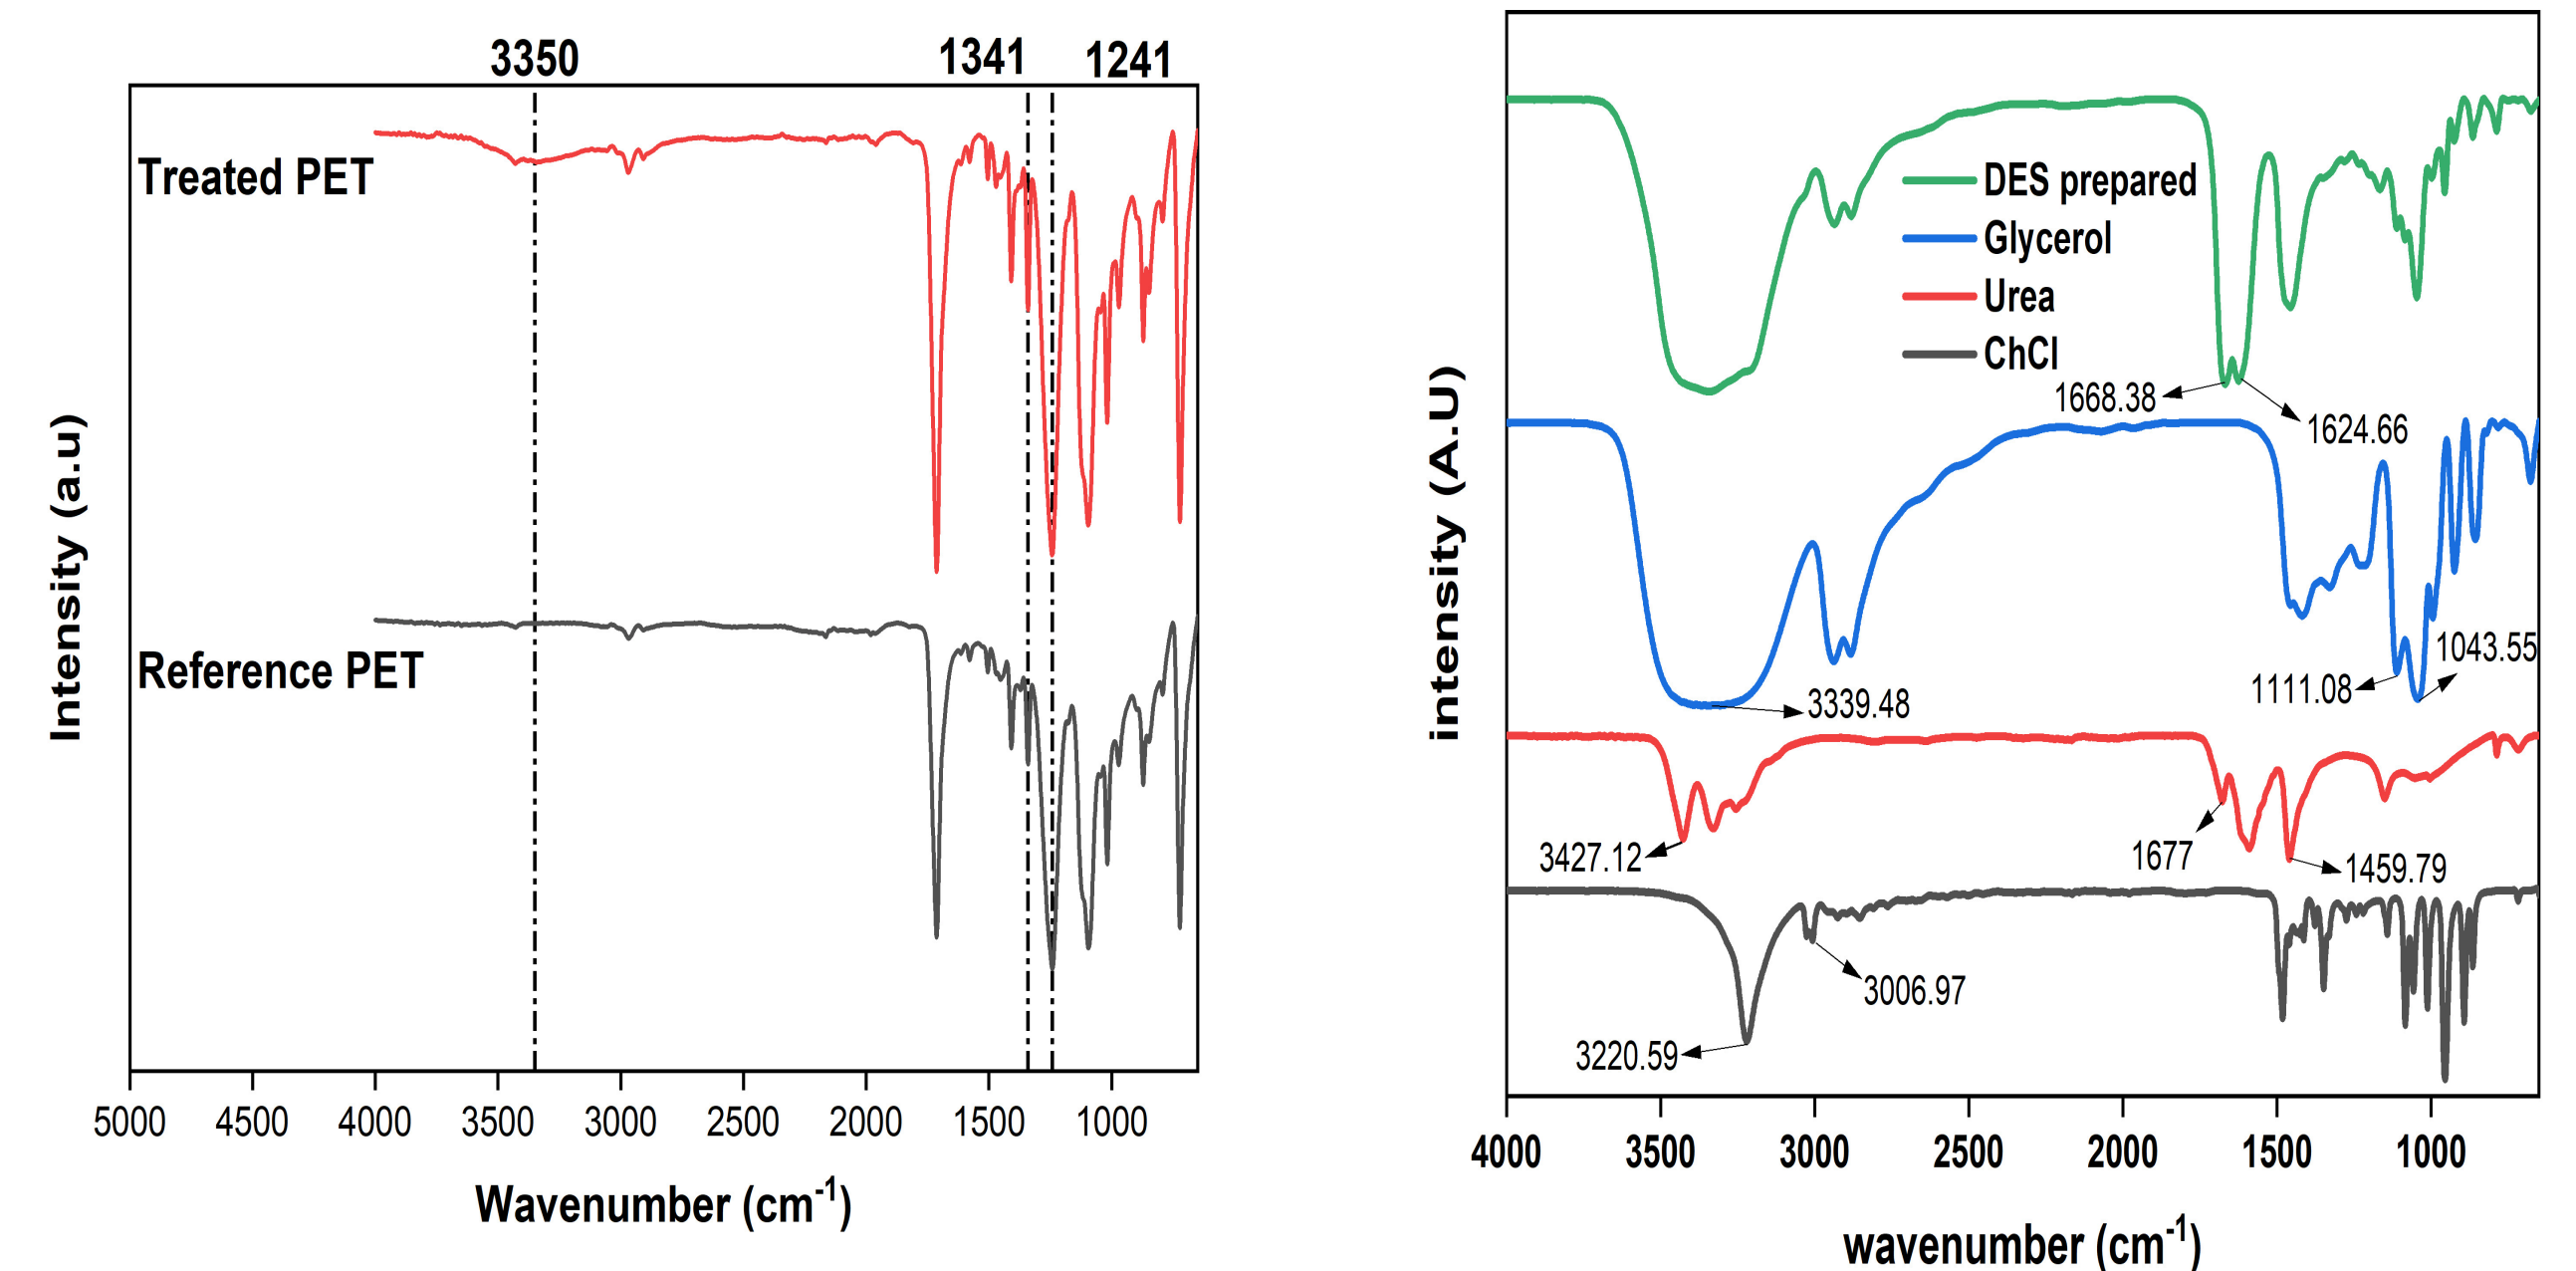

Figure 1: FTIR analysis of DES, Pure PET and Treated PET

### TGA:

The reference PET has main weight loss at 395°C as a result of thermal decomposition but treated PET showed a lower weight loss temp around 130°C .it could be because of decrease in thermal stability depicting lower molecular weight product formation as shown in Figure.2

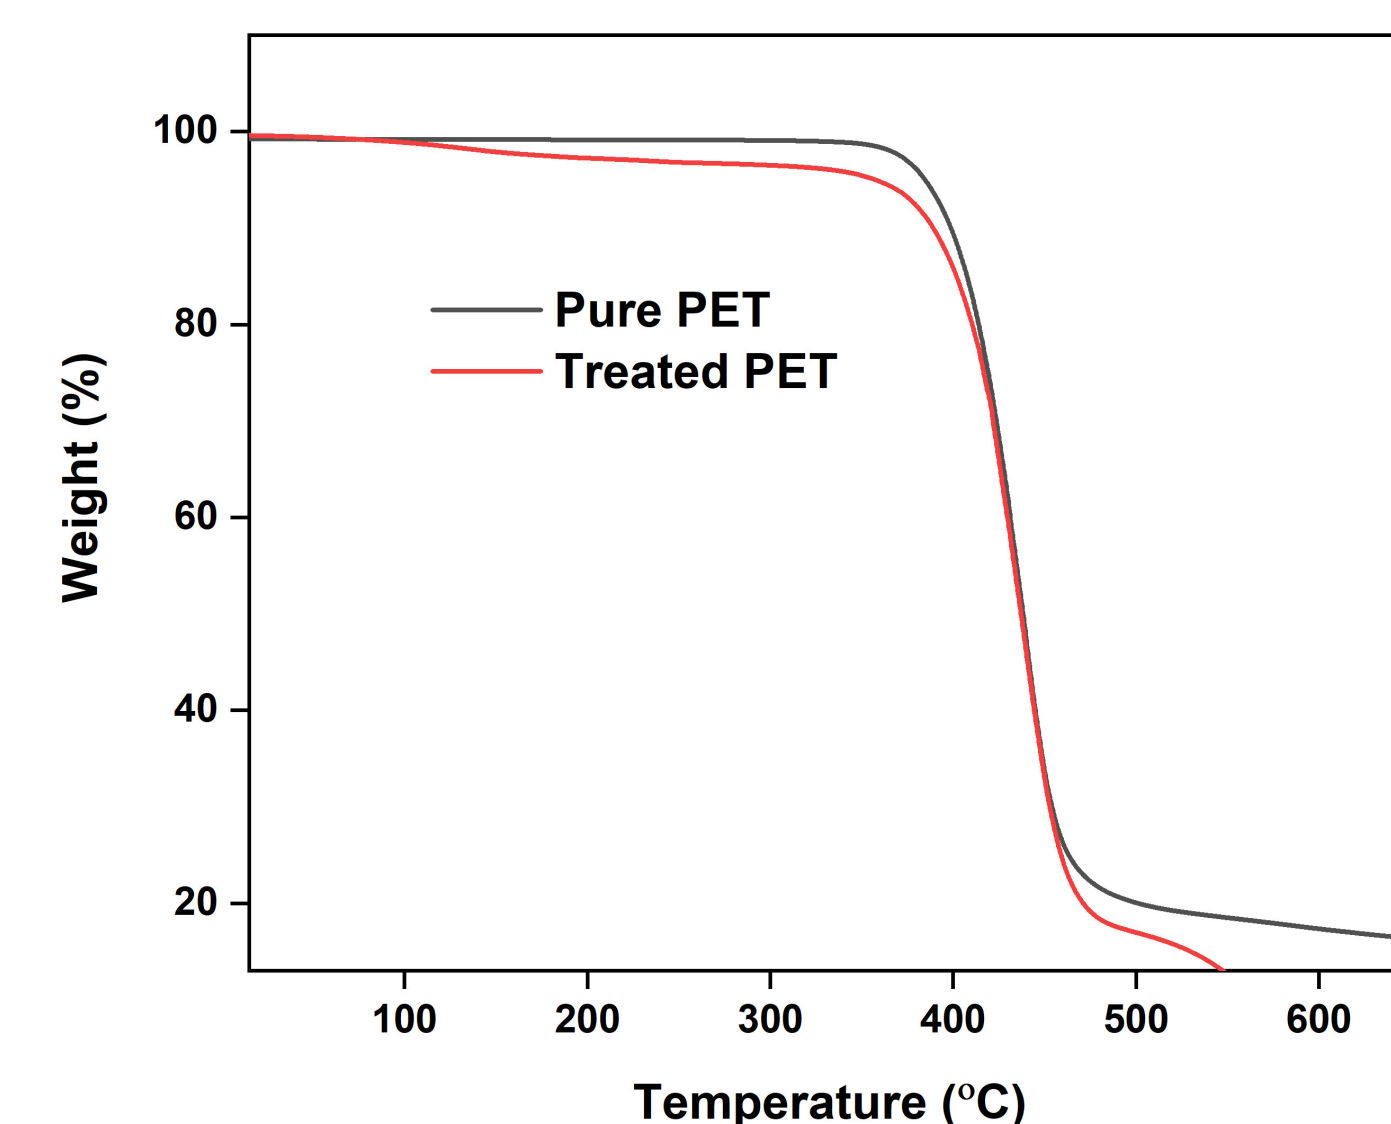

Figure 2: TGA analysis of Pure PET and Treated PET

## Conclusions

- FTIR, TGA, and DSC spectra of the residual PET obtained after treatment with the microwave-assisted DES technique showed a significant increase in residual PET carbonyl index and percentage weight loss at onset temperature of degradation and reduction of PET crystallinity

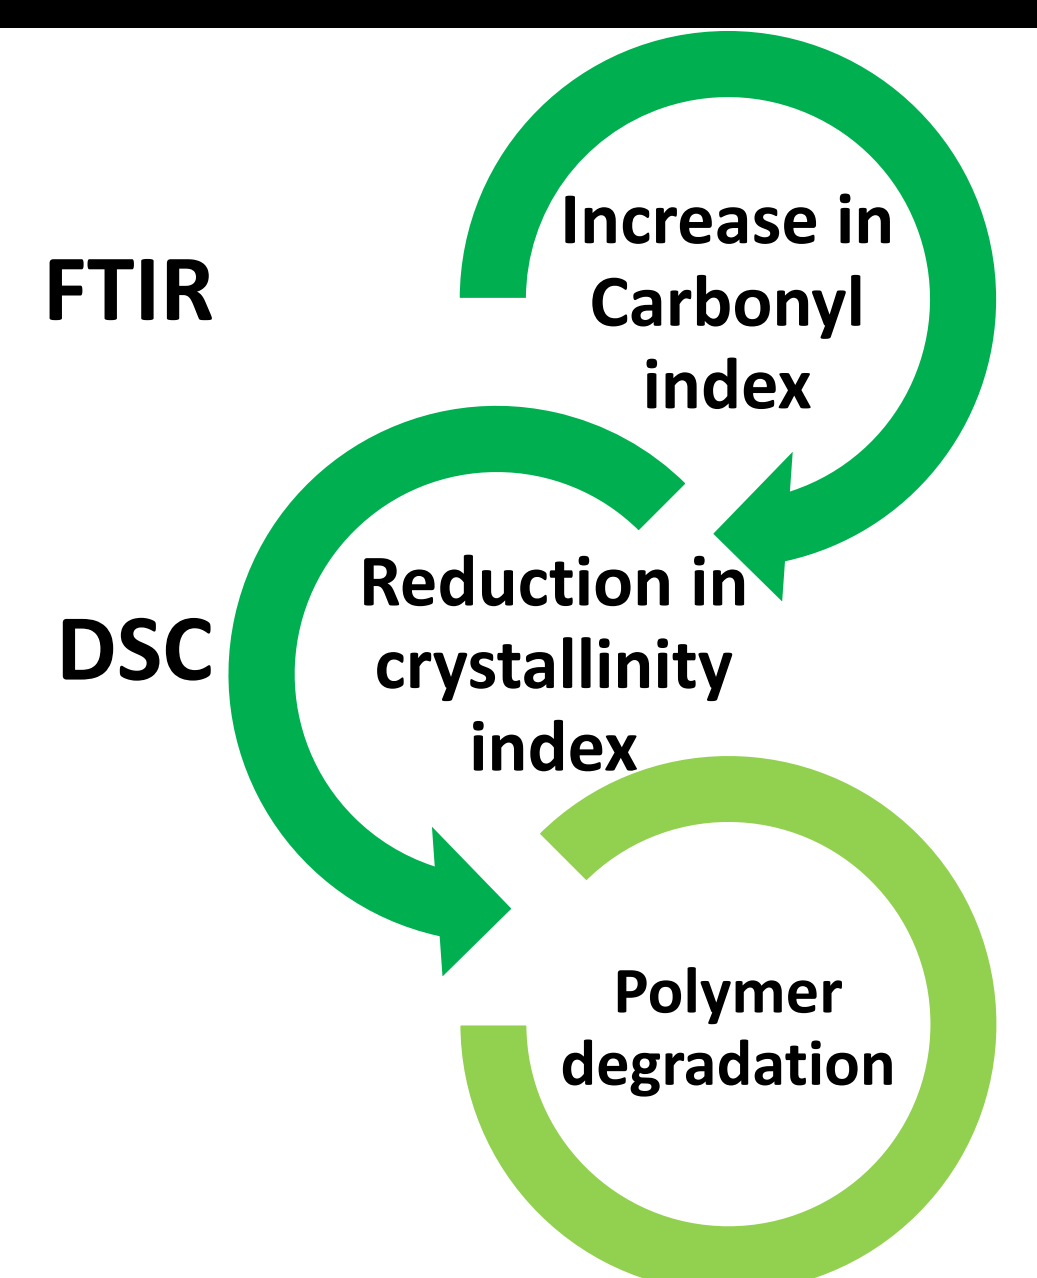

## Future Work

- Enzymatic degradation analysis will be carried out on treated plastics
- Effect of ultrasonication coupled with microwave will be evaluated.

## References

- Y. Li, J. Li, S. Guo, and H. Li, "Mechanochemical degradation kinetics of high-density polyethylene melt and its mechanism in the presence of ultrasonic irradiation," Ultrason. Sonochem., vol. 12, no. 3, pp. 183–189, 2005, doi: 10.1016/j.ultsonch.2003.10.011.
- T. Aarthi, M. S. Shaama, and G. Madras, "Degradation of water soluble polymers under combined ultrasonic and ultraviolet radiation," Ind. Eng. Chem. Res., vol. 46, no. 19, pp. 6204–6210, 2007, doi: 10.1021/ie070287+.
